# Supplementary material
Source: PubMed Central journal article supplement (PMC5590728)
Supplement: NIHMS73431-supplement-SI_Guide.pdf [file NIHMS73431-supplement-SI_Guide.pdf]

SIGuide, Andersen et al.

Supplementary Figure 1 (uncropped western blot images)

Supplementary Table 1 *Drosophila melanogaster* fly strains

Supplementary Table 2 Oligo sequences

Supplementary Table 3 Antibodies

Supplementary Table 4 Plasmids

Supplementary Table 5 Stellaris probe sequences

Supplementary Table 6 Sequence accessions for Extended Data Figure 2b

Supplementary Note 1 (extended discussion)

Supplementary Note 2 (extended discussion)

Supplementary Note 3 A central function of TRF2 in animal germline heterochromatin formation
