# Supplementary material
Source: PubMed Central journal article supplement (PMC5590728)

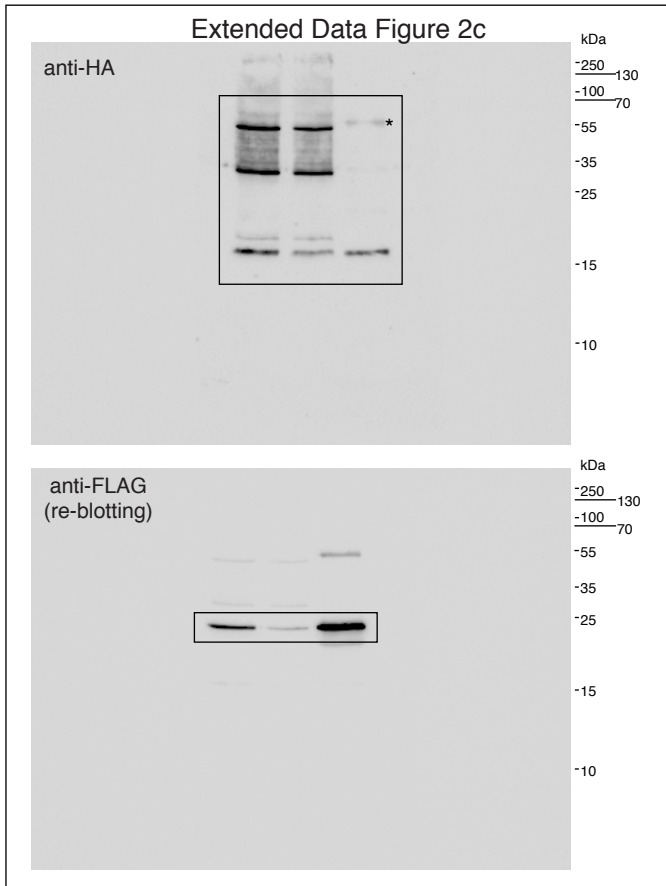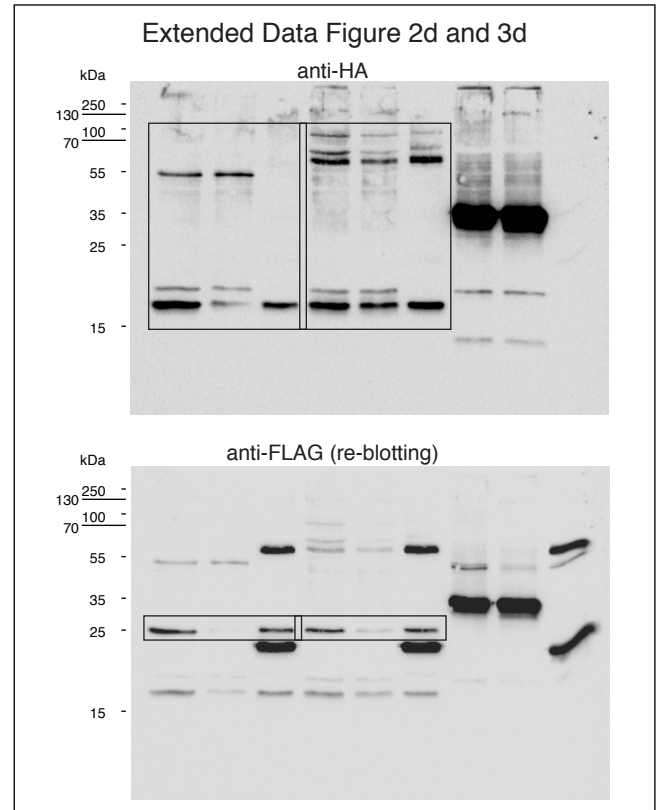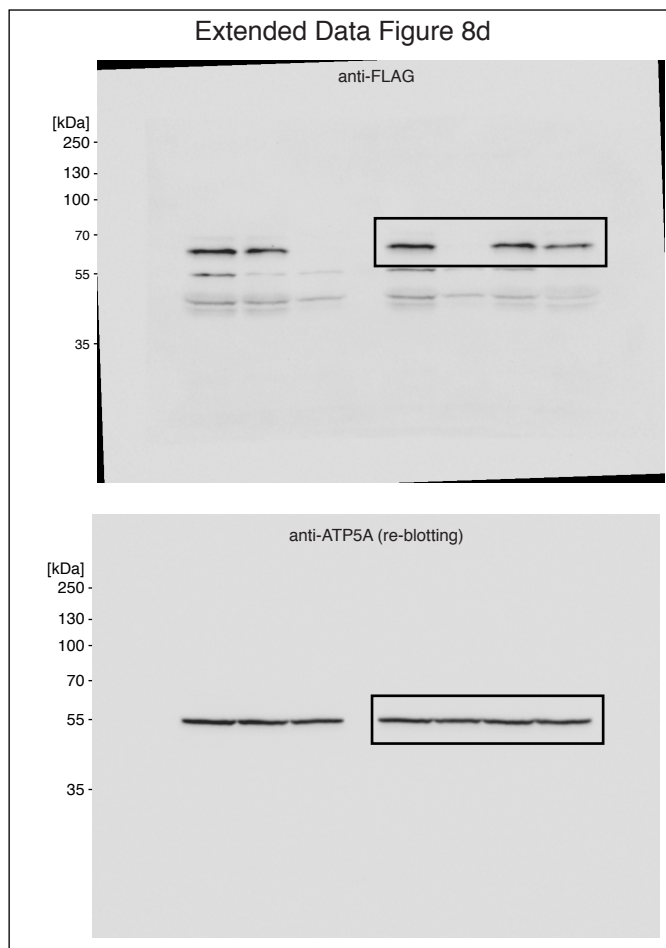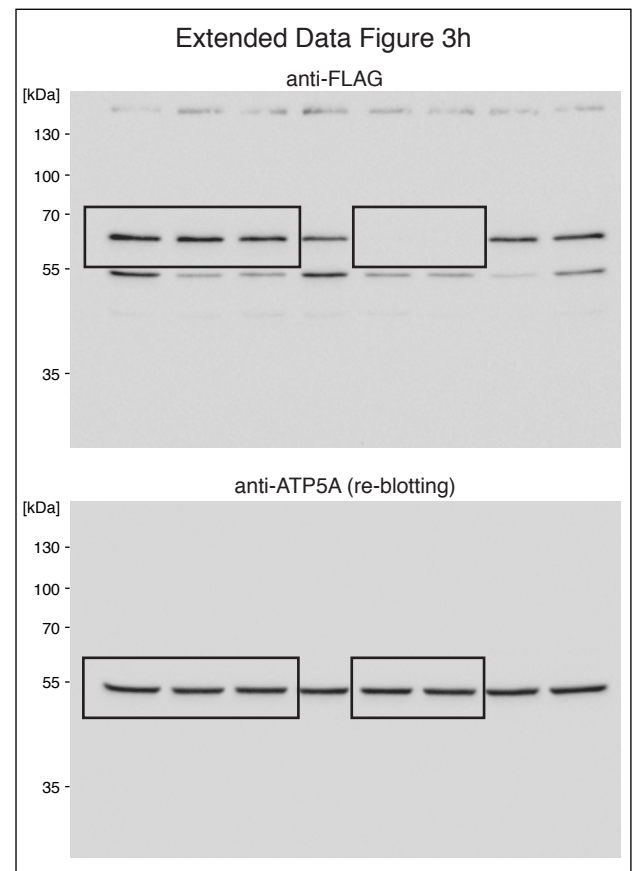

Supplement: NIHMS73431-supplement-Supplementary_Figure_1.pdf [file NIHMS73431-supplement-Supplementary_Figure_1.pdf]
